# Supplementary material for: PtM/CNT (M = Mo, Ni, CoCr) Electrocatalysts with Reduced Platinum Content for Anodic Hydrogen Oxidation and Cathodic Oxygen Reduction in Alkaline Electrolytes
Source: MDPI journal article supplement (doi:10.3390/catal13010161), 2023-01-10
Supplement: s1 [file s1]

## Supplementary materials

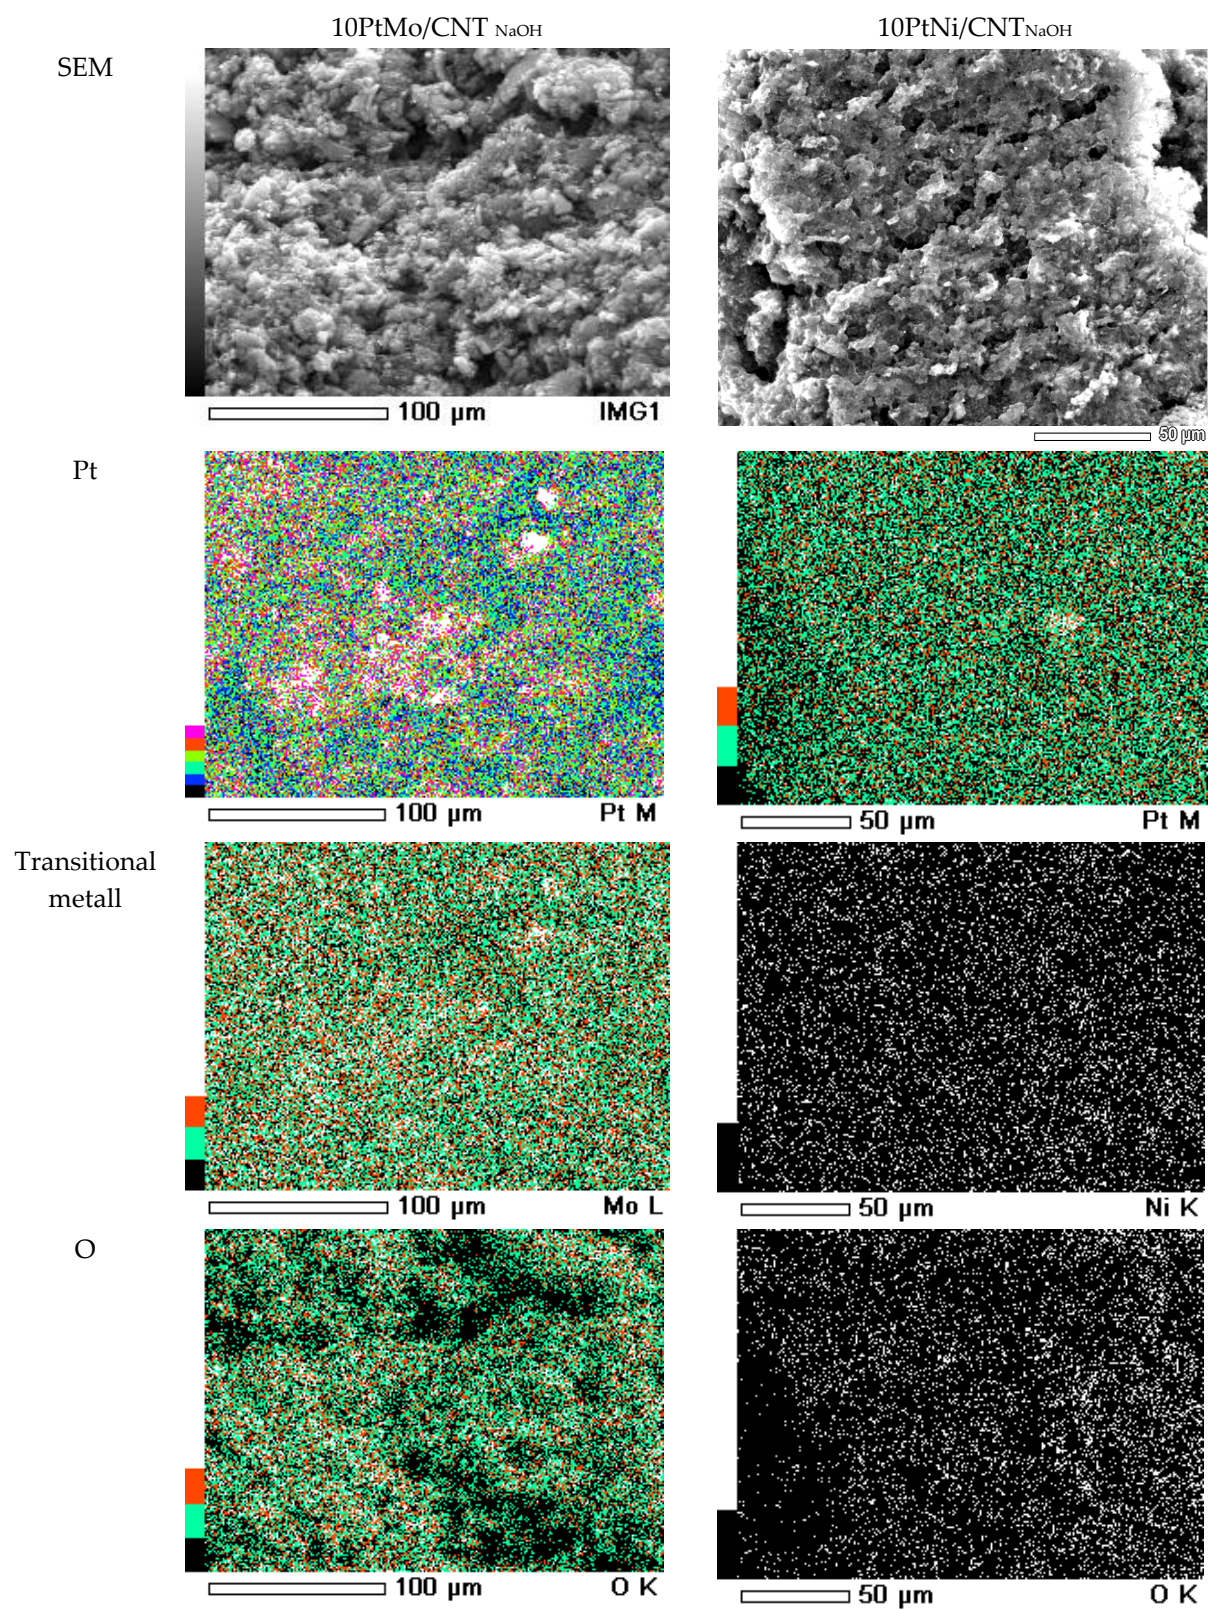

Figure S1. SEM image and elemental composition (EDX) of synthesized catalysts

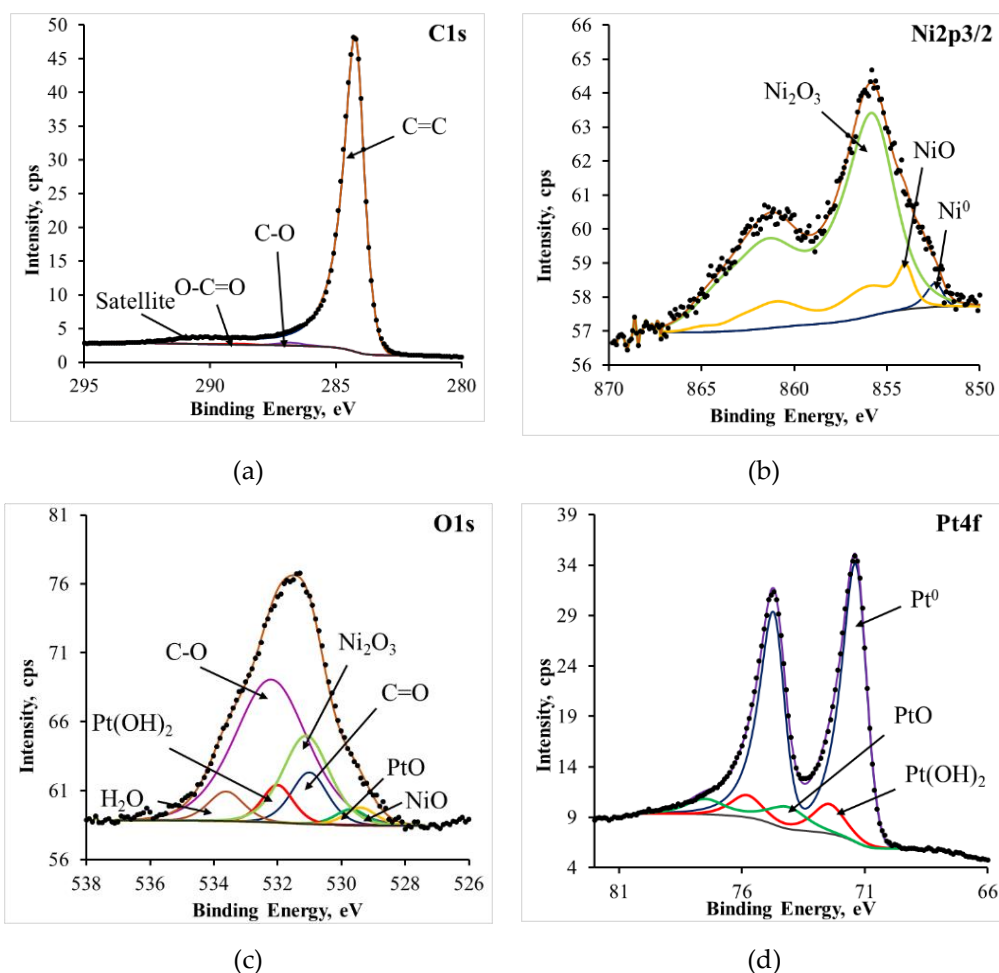

**Figure S2.** C1s (a), Ni2p3/2 (b), O1s (c), and Pt4f (d) X-ray spectra recorded on 10PtNi/CNT<sub>NaOH</sub>

#### Detailed discussion of XPS.

The spectra of C1s electrons can be adjusted depending on the sample by three or four states. The asymmetric peak with a maximum at 284.2 eV with a pronounced satellite at 290 eV can be attributed to sp<sup>3</sup>-hybridized carbon, denoted C=C in the Figure S2 a, with a small fraction of sp<sup>2</sup>-hybridized carbon at the position of 285.0 eV, the peak of which is noticeable in original sample 10Pt/CNT<sub>NaOH</sub>. The other two peaks can be attributed to oxygen-containing states of carbon such as C-O and C(O)O with maxima at 286.8 and 288.8 eV, respectively.

According to XPS studies, Figure S2 d, platinum is in three states: the most intense and a doublet with the position of the Pt4f7/2 peak at 71.4 eV, which can be attributed to Pt<sup>0</sup>; Pt(OH)<sub>2</sub> with a maximum of 72.4 eV and PtO at 74.2 eV.

On the oxygen spectrum of the original sample, 5 states of the element are observed, two of which refer to the carbon-bonded C=O and C-O atoms with positions 530.8 and 531.9 eV, respectively, the peak related to H<sub>2</sub>O (533.4 eV), and also two states of PtO and Pt(OH)<sub>2</sub> with maxima at 529.8 and 532 eV, respectively. When Mo or Ni is added to 10Pt/CNT<sub>NaOH</sub>, additional peaks appear, so in the first case at 530.6 eV, and in the second case at 529.5 and 531.1 eV. In the case of 10PtMo/CNT<sub>NaOH</sub>, the presence of MoO<sub>3</sub> can be assumed, which is confirmed by the spectrum of molybdenum Mo3d, in which the Mo3d5/2 peak of the Mo3d doublet is located at 232.8 eV. On the 10PtNi/CNT<sub>NaOH</sub> sample, the states of oxygen atoms can be additionally attributed to NiO (529.5 eV) and Ni<sub>2</sub>O<sub>3</sub> (531.1 eV). In turn, three states of the element can be distinguished in the spectrum of Ni2p3/2 electrons: a low-intensity Ni<sup>0</sup> peak with a maximum of 852.4 eV; a curve including satellites, NiO (854.4 eV) and also a complex curve at 856 eV, which can be attributed to Ni<sub>2</sub>O<sub>3</sub>.

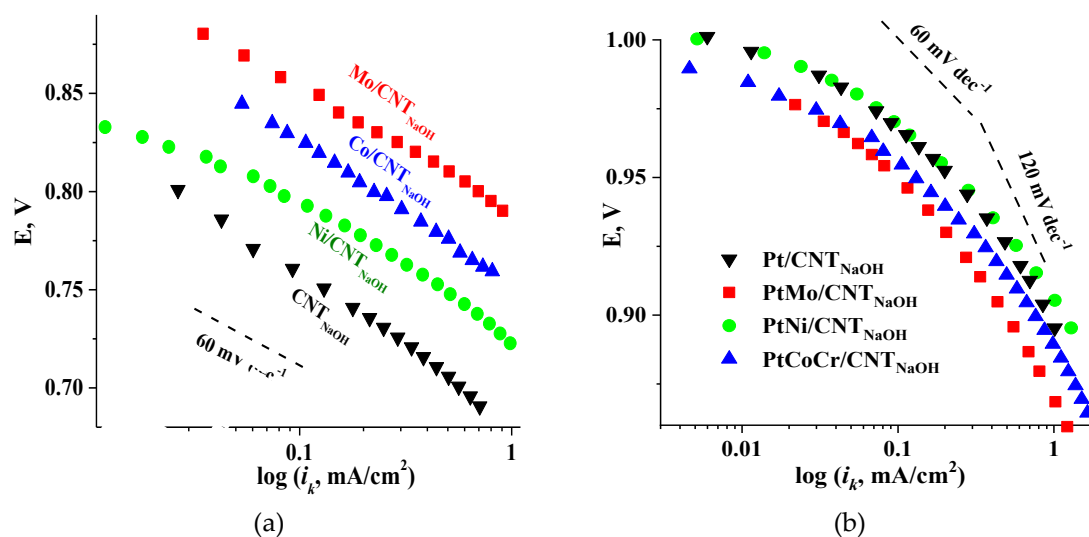

**Figure S3.** Tafel plots for a – transition metal catalysts, b – Pt-containing catalysts

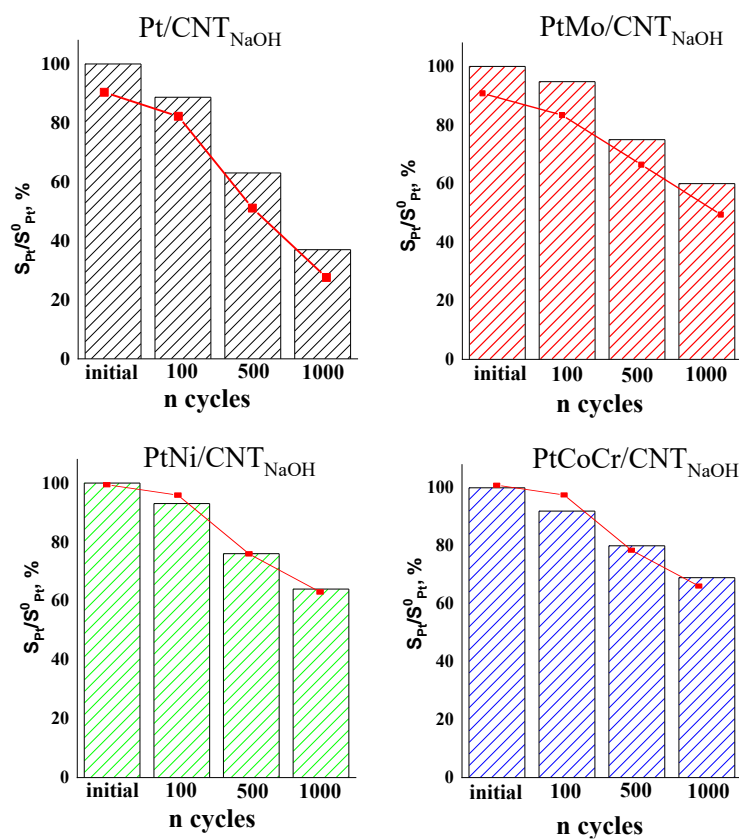

**Figure S4.** Diagrams of changes in the relative size of the surface of platinum during accelerated corrosion testing. 0.1M KOH, 50 mV/s, 100  $\mu\text{g/cm}^2$ .
