# Supplementary material for: PtM/CNT (M = Mo, Ni, CoCr) Electrocatalysts with Reduced Platinum Content for Anodic Hydrogen Oxidation and Cathodic Oxygen Reduction in Alkaline Electrolytes
Source: MDPI journal article supplement (doi:10.3390/catal13010161), 2023-01-10
Supplement: s1 [file s1]

Archive with 1 entries (1 files):
- catalysts-2119228-supplementary.pdf
